# Supplementary material
Source: publisher site journal article supplement (https://www.dovepress.com/article/485252)
Supplement: Supplementary file 1 [file get_supplementary_file.php]

**Figure S1. The protein expression of astrocyte activation markers after MCAO/R.** (A) The WB results of A1 activation marker C3 in astrocytes were measured at 1, 3, 5 and 7 d after MCAO/R (n=6). (B) The WB results of A2 activation marker S100A10 in astrocytes were measured at 1, 3, 5 and 7 d after MCAO/R (n=6). (C) The quantitative analysis for C3 in images of (A). (D) The quantitative analysis for S100A10 in images of (B). Data were represented as mean ± SD. ***P* < 0.01; ****P* < 0.001 and “ns” for comparison with the sham group. The “ns” stands for no statistical significance. MCAO/R, middle cerebral artery occlusion/reperfusion model. WB, western blotting analysis.

**
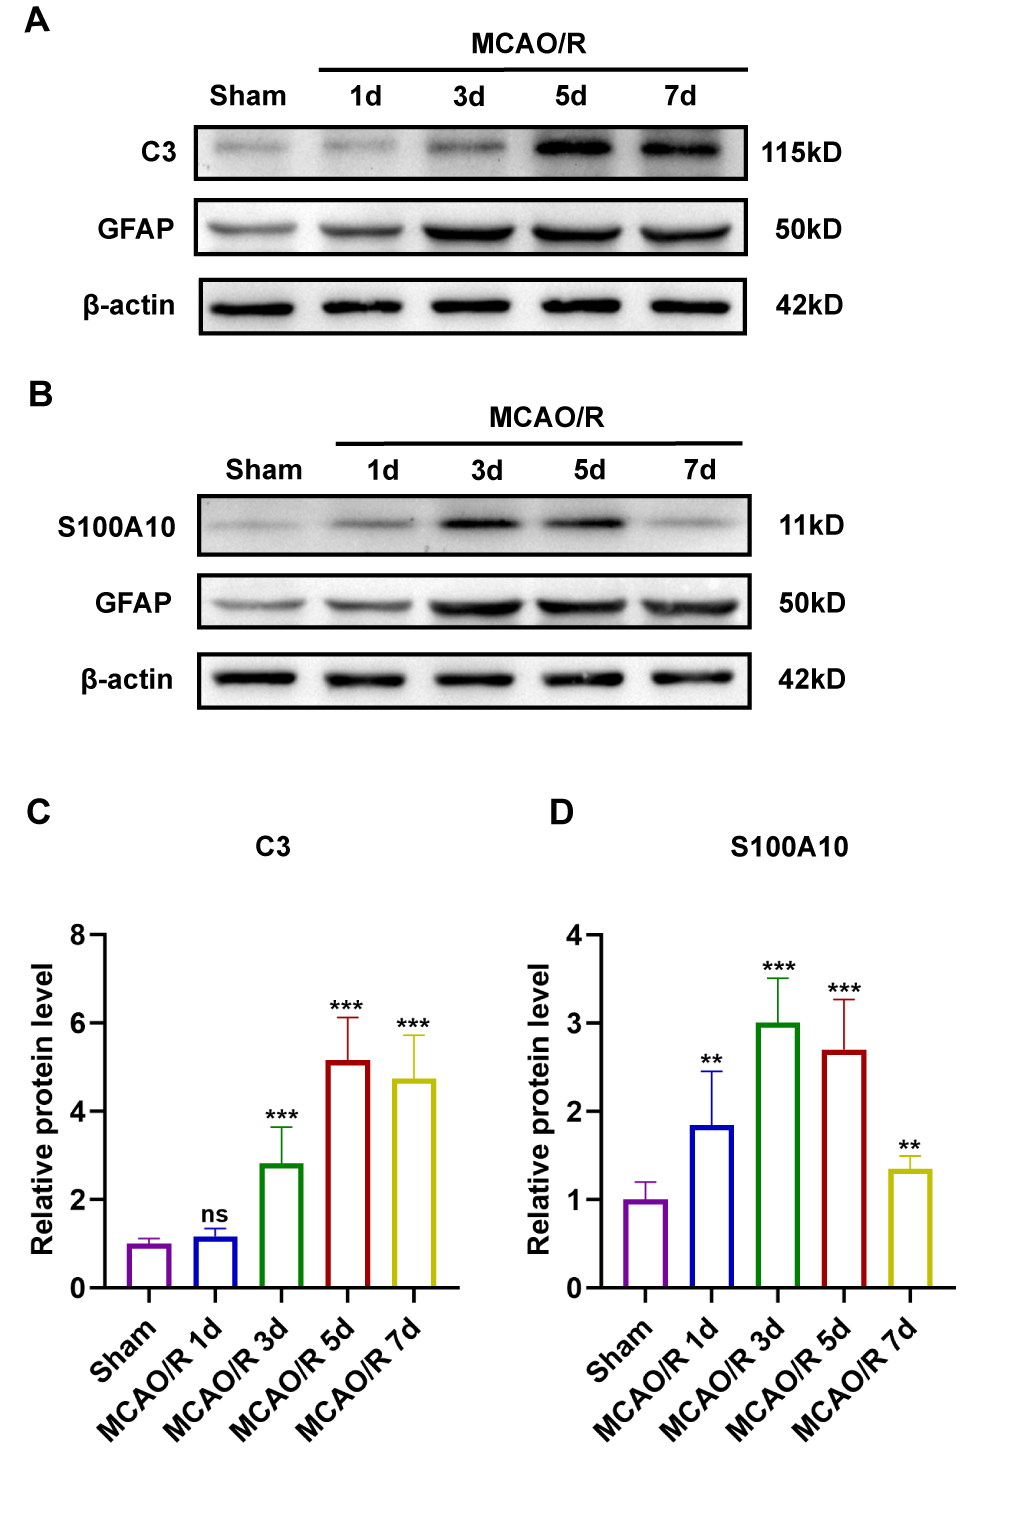
**

**Figure S2. The expression of negative exosome markers, GM130 and calnexin, in microglia and exosomes.** M0-exo, exosomes isolated from microglia under standard cell culture conditions. M1-exo, exosomes isolated from M1 microglia after OGD/R.

**
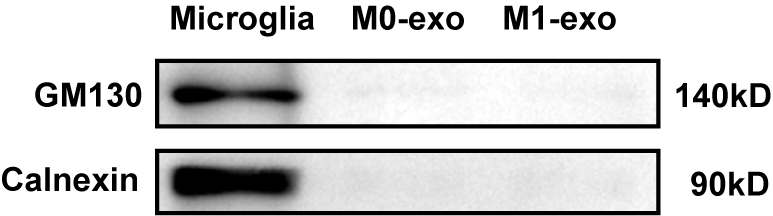
**

**Figure S3. The uptake of exosomes in astrocytes.** Immunofluorescence images of exosomes devoured by astrocytes. Exosomes were stained red and GFAP was stained green. The arrows indicated the exosomes phagocytosed by astrocytes. Scale of bar: 20 μm.

**
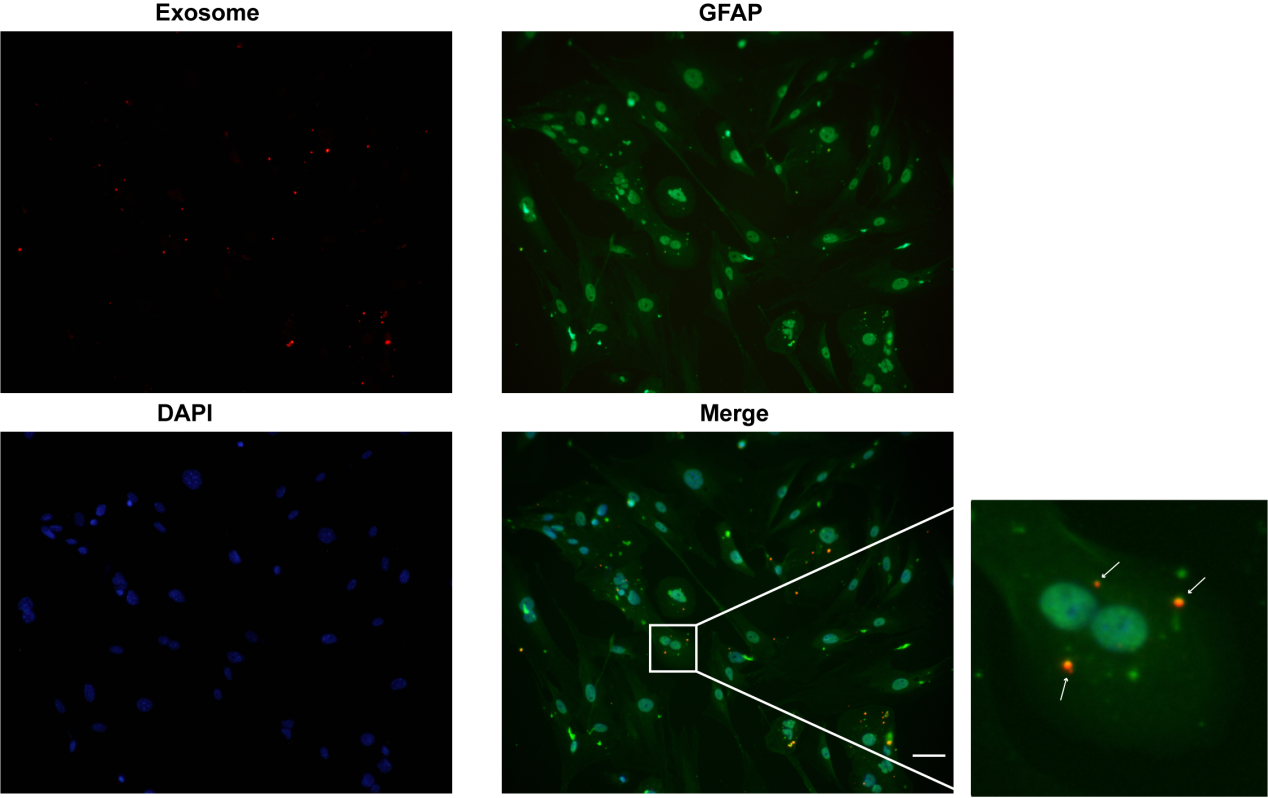
**

**Table S1. The Primer sequences for qRT-PCR.**

| Name | Sequence |
| --- | --- |
| mmu-circ-STRN3 | F:5’-AGGTAATGAAGGTTTAGCTGCTGAC-3’  R:5’-CCCTTTCTTGTTTTAATGCATACTC-3’ |
| mmu-miR-331-5p | F:5’-AGATCGCTAGGTATGGTCCCAG-3’  R:5’-TATCCTTCTTCACGACTCCTTCAC-3’ |
| mmu-β-actin | F:5’-CCACCATGTACCCAGGCATT-3’  R:5’-CGGACTCATCGTACTCCTGC-3’ |
| mmu-U6 | F:5’-CAGCACATATACTAAAATTGGAACG-3’  R:5’-ACGAATTTGCGTGTCATCC-3’ |

**Table S2. Demographic and clinical characteristics of participants.**

| Baseline Characteristics | HC(n=30) | IS(n=30) |
| --- | --- | --- |
| Age, mean (SD), y | 64.33(8.39) | 67.60(10.06) |
| Male, n (%) | 27(90.0) | 22(73.3) |
| Smoking, n (%) | 20(66.7) | 19(63.3) |
| Drinking, n (%) | 12(40.0) | 15(50.0) |
| Hypertension, n (%) | 20(66.7) | 24(80.0) |
| Diabetes Mellitus, n (%) | 3(10.0) | 22(73.3) |
| Dyslipidemia, n (%) | 18(60.0) | 19(63.3) |
| NIHSS score on admission, mean(SD) | 0(0) | 5.53(2.40) |

Notes: HC, health control. IS, ischemic stroke.
